# Supplementary material
Source: PubMed Central journal article supplement (PMC4342292)
Supplement: NIHMS640416-supplement-4.pdf [file NIHMS640416-supplement-4.pdf]

| <b>Oligo ID</b> | <b>Locus Link_ID</b> | <b>Accession Number</b> | <b>Gene Symbol</b> | <b>Gene Description</b>                          | <b>PPAR vs WT Fold Change</b> | <b>P value</b> | <b>FDR</b> |
|-----------------|----------------------|-------------------------|--------------------|--------------------------------------------------|-------------------------------|----------------|------------|
| mMC017661       | 19016                | NM_011146               | Pparg              | peroxisome proliferator activated receptor gamma | 47.75602019                   | 0              | 0          |
| mMC019932       | 14081                | NM_007981               | Acs11              | acyl-CoA synthetase long-chain family member 1   | 0.58                          | 0              | 0          |
| mMC011795       | 66853                | NM_025802               | Pnpla2             | patatin-like phospholipase domain containing 2   | 2.50429773                    | 0              | 0          |

Supplemental Table 2: Microarray gene expression analysis of cardiac RNA obtained from MHC-PPAR $\gamma$  mice and wild type littermate control mice.
