# Supplementary material
Source: PubMed Central journal article supplement (PMC4342292)
Supplement: NIHMS640416-supplement-5.pdf [file NIHMS640416-supplement-5.pdf]

Supplemental Table 1: List of primers used for qRT-PCR.

| <b>Gene</b>       | <b>Forward primer (5'→3')</b> | <b>Reverse primer (5'→3')</b> |
|-------------------|-------------------------------|-------------------------------|
| β-actin           | GACAGGATGCAGAAGGAGATTACT      | TGATCCACATCTGCTGGAAGGT        |
| ACS               | CTGCCCCAGATCAGTTCATT          | GCCTTCTCTGGCTTGTCAAC          |
| CHOP              | TGCCTTTCTCTTCGGACACT          | TGTGACCTCTGCTGGTTCTG          |
| ATF6              | GCCTTTATTGCTTCCAGCAG          | TGAGACAGCAAAACCGTCTG          |
| PPAR <sub>γ</sub> | GCTGTGCAGGAGATCACAGA          | GGGCTCCATAAAGTCACCAA          |
| CD36              | CAGCCTCATTTCACCTTTTGTT        | GTTGACCTGCAGCCGTTTTG          |
| GRP78             | ATCTGAGCTGGCTCCTAGAGT         | GGTCTACAAGGAGCAGCAACTA        |
| GRP94             | TTCCGCCTTCCTTGTAGCAG          | GGGTAATTGTCGTTCCCCGT          |
