# Supplementary material
Source: PubMed Central journal article supplement (PMC4342292)

**A**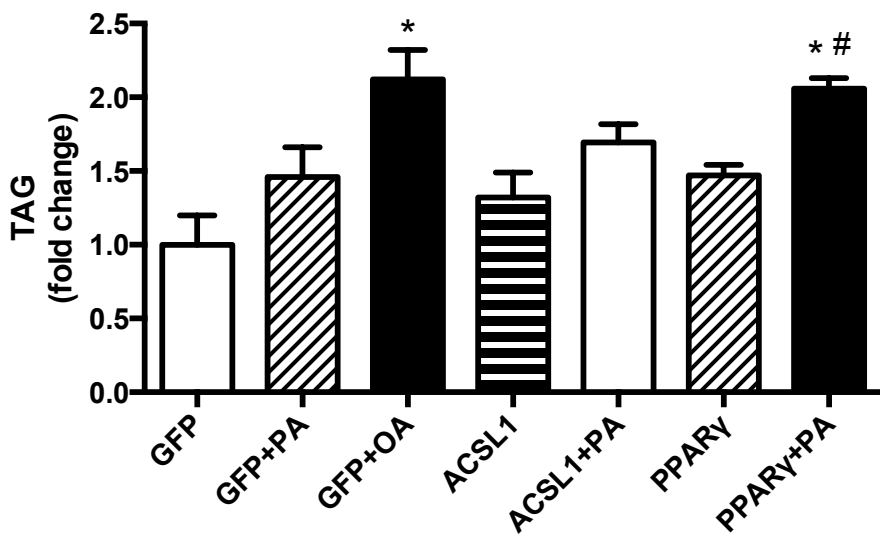**B**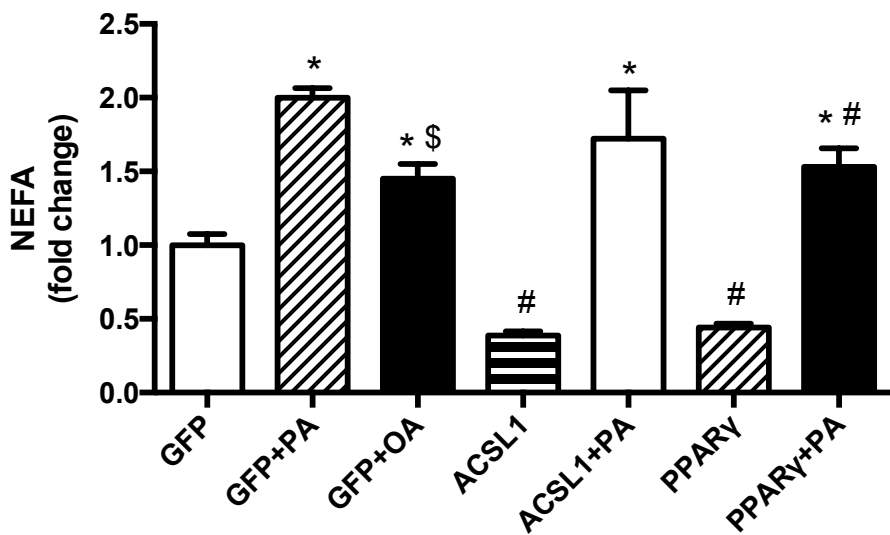

Supplement: NIHMS640416-supplement-1.pdf [file NIHMS640416-supplement-1.pdf]

**Ad-GFP**

**Ad-GFP**

**Ad-PPARG**

**Ad-PPARG**

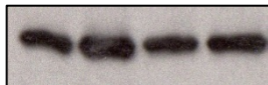

**pEIF2a**

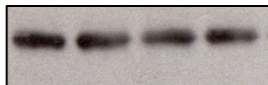

**EIF2a**

**Supplemental Fig. 2**

Supplement: NIHMS640416-supplement-2.pdf [file NIHMS640416-supplement-2.pdf]

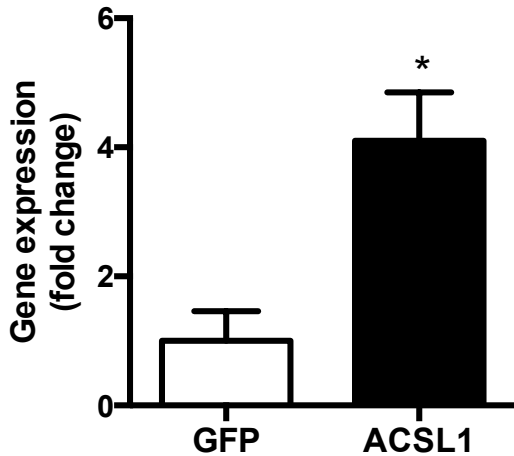

**Supplemental Fig. 3**

Supplement: NIHMS640416-supplement-3.pdf [file NIHMS640416-supplement-3.pdf]
